# Supplementary material
Source: PubMed Central journal article supplement (PMC1072806)
Supplement: nar_33_6_e55__1.pdf [file nar_33_6_e55__1.pdf]

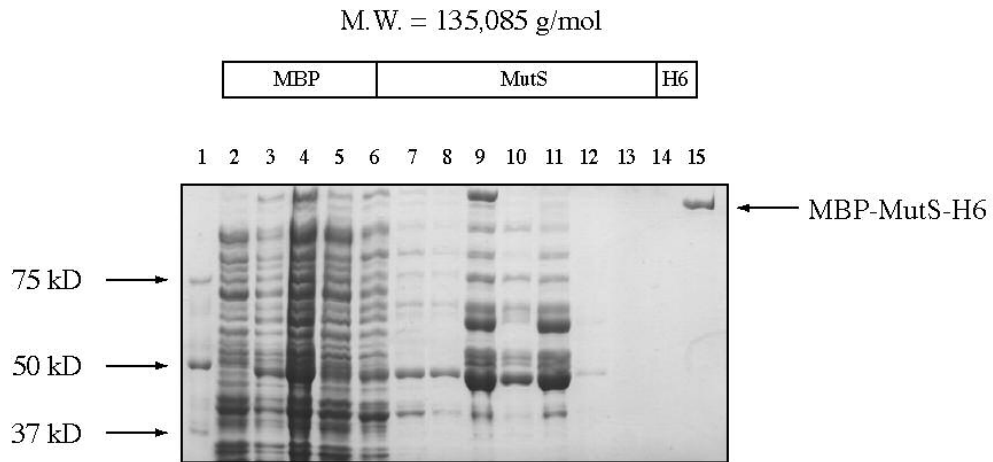

**Supplementary Figure 1.** Purification of MBP-MutS-H6 as outlined in Materials and Methods. Lane 1, M.W. markers. Lane 2, uninduced cell pellet. Lane 3, induced cell pellet. Lane 4, soluble fraction. Lane 5, MBP column flow-through. Lane 6, MBP column wash 1. Lane 7, MBP column wash 2. Lane 8, MBP column wash 3. Lane 9, MBP column elution. Lane 10, Ni-NTA column flow-through. Lane 11, Ni-NTA column wash 1. Lane 12, Ni-NTA column wash 2. Lane 13, Ni-NTA column wash 3. Lane 14, Ni-NTA column wash 4. Lane 15, Ni-NTA column elution.
