# Supplementary material
Source: PubMed Central journal article supplement (PMC1072806)
Supplement: nar_33_6_e55__2.pdf [file nar_33_6_e55__2.pdf]

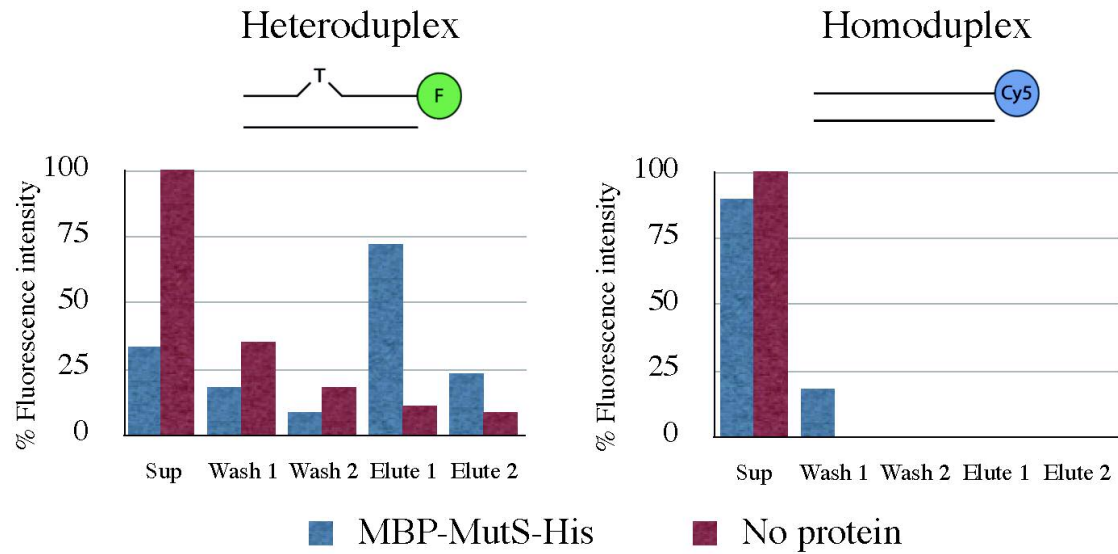

**Supplementary Figure 2.** MBP-MutS-H6 control binding experiment as outlined in Supplementary Methods. The relative fluorescence intensity of each sample is expressed as a percentage of the signal in the supernatant of the ‘No protein’ control sample. ‘Sup’ signifies supernatant following low-speed centrifugation of amylose resin.
