# Supplementary material
Source: PubMed Central journal article supplement (PMC1072806)
Supplement: nar_33_6_e55__4.pdf [file nar_33_6_e55__4.pdf]

|       |                                           |
|-------|-------------------------------------------|
| F1    | AGAGGATCCCCGGGTACCGGTAGAAAAAATGAGTAAAGGA  |
| F2    | GAAGAACTTTTCACTGGAGTTGTCCCAATTCTTGTTGAAT  |
| F3    | TAGATGGTGTATGTTAACGGGCACAAATTTTCTGTCAGTGG |
| F4    | AGAGGGTGAAGGTGATGCAACATACGGAAAACCTACCCTT  |
| F5    | AAATTTATTTGCACTACTGGAAAACCTGTTCCATGGC     |
| F6    | CAAACTTGTCACTACTTTTCTTATGGTGTTCATGCTT     |
| F7    | TTCCCGTTATCCGGATCATATGAAACGGCATGACTTTTTTC |
| F8    | AAGAGTGCCATGCCCCGAAGGTTATGTACAGGAACGCACTA |
| F9    | TATCTTTCAAAGATGACGGGAACTACAAGACGCGTGCTGA  |
| F10   | AGTCAAGTTTGAAGGTGATACCCTTGTTAATCGTATCGAG  |
| F11   | TTAAAAGGTATTGATTTTAAAGAAGATGGAAACATTCTCG  |
| F12   | GACACAACTCGAGTACAACTATAACTCACACAATGTATA   |
| F13   | CATCACGGCAGACAAAACAAAAGAATGGAATCAAAGCTAAC |
| F14   | TTCAAATTCGCCACAACATTGAAGATGGAAGCGTTCAAC   |
| F15   | TAGCAGACCATTATCAACAAAATACTCCAATTGGCGATGG  |
| F16   | CCCTGTCCTTTTACCAGACAACCATTACCTGTGACACAA   |
| F17   | TCTGCCCTTTTCGAAAGATCCCAACGAAAAGCGTGACCACA |
| F18   | TGGTCCCTTCTTGAGTTTGTAACTGCTGCTGGGATTACACA |
| F19   | TGGCATGGATGAGCTCTACAAATAATGAATTCCAACCTGAG |
| R1    | CTCAGTTGGAATTCATTATT                      |
| R2    | TGTAGAGCTCATCCATGCCATGTGTAATCCCAGCAGCAGT  |
| R3    | TACAAACTCAAGAAGGACCATGTGGTCACGCTTTTCGTTG  |
| R4    | GGATCTTTTCGAAAGGGCAGATTGTGTCGACAGGTAATGGT |
| R5    | TGTCTGGTAAAAGGACAGGGCCATCGCCAATTGGAGTATT  |
| R6    | TTGTTGATAATGGTCTGCTAGTTGAACGCTTCCATCTTCA  |
| R7    | ATGTTGTGGCGAATTTTGAAGTTAGCTTTGATTCCATTCT  |
| R8    | TTTGTGTTGTCTGCCGTGATGTATACATTGTGTGAGTTATA |
| R9    | GTTGTACTCGAGTTTGTGTCCGAGAATGTTTCCATCTTCT  |
| R10   | TTAAAATCAATACCTTTTAACTCGATACGATTAACAAGGG  |
| R11   | TATCACCTTCAAACCTTGACTTCAGACGCGTCTTGTAGTT  |
| R12   | CCCGTCATCTTTGAAAGATATAGTGCGTTCCTGTACATAA  |
| R13   | CCTTCGGGCATGGCACTCTTGAAAAAGTCATGCCGTTTCA  |
| R14   | TATGATCCGGATAACGGGAAAAGCATTGAACACCATAAGA  |
| R15   | GAAAGTAGTGACAAGTGTGGCCATGGAACAGGTAGTTTT   |
| R16   | CCAGTAGTGCAAATAAATTTAAGGGTAAGTTTTCCGTATG  |
| R17   | TTGCATCACCTTCACCCTCTCCACTGACAGAAAATTTGTG  |
| R18   | CCCGTTAACATCACCATCTAATTCAACAAGAATTGGGACA  |
| R19   | ACTCCAGTGAAAAGTTCTTCTCCTTTACTCATTTTTTCTA  |
| R20   | CCGGTACCCGGGGATCCTCT                      |
| R20RC | AGAGGATCCCCGGGTACCGG                      |

**Supplementary Table 1.** Oligonucleotides used in *GFPuv* assembly and amplification. All Oligos were purchased from Qiagen with ‘salt-free’ purification. Oligos F1-19 and R1-20 were used to assemble *GFPuv*. Assembly product was amplified using primers R1 and R20RC.
